# Supplementary material
Source: publisher figshare collection journal article supplement (https://gsapubs.figshare.com/articles/dataset/_/12541163)
Supplement: Supplementary file 1 [file 1]

## Sheet: Data Information
The file contains four datasheets with coordiantes of the location of channel incision points upstream of debris flow fans at Beechworth, Kilmore-Murrundindi, The Grampians and Wilsons Promontory. The corrdinate systems are; Beechworth - GDA 94_Zone55 (EPSG:28355) Wilsons Promontory - GDA 94_Zone55 (EPSG:28355) Kilmore-Murrundindi - GDA 94_Zone55 (EPSG:28355) The Grampians - - GDA 94_Zone55 (EPSG…

## Sheet: Kilmore-Murrundindi
Channel head	Easting	Northing
1	349901	5.86195e+06
2	338666	5.8739e+06
3	338509	5.87373e+06
4	338374	5.87353e+06
5	337572	5.87359e+06
6	339249	5.87375e+06
7	338843	5.87382e+06
8	339053	5.87354e+06
9	338974	5.8735e+06
10	338719	5.87222e+06
11	338492	5.87261e+06
12	338402	5.87201e+06
13	338526	5.87201e+06
14	338199	5.87221e+06
15	338015	5.87242e+06
16	337890	5.87246e+06
17	337889	5.8728e+06
18	339529	5.87288e+06
19	339367	5.87293e+06
20	339805	5.87205e+06
21	339463	5.87213e+06
22	339980	5.87216e+06
23	339994	5.8725e+06
24	338963	5.87218e+06
25	339145	5.87201e+06
26	339212	5.87179e+06
27	339367	5.87191e+06
28	335501	5.87305e+06
29	337889	5.8709e+06
30	338587	5.87095e+06
31	338404	5.87111e+06
32	338041	5.87129e+06
33	337896	5.87152e+06
34	337655	5.87143e+06
35	337265	5.87211e+06
36	337144	5.87218e+06
37	336799	5.87227e+06
38	335808	5.87276e+06
39	336012	5.8726e+06
40	336048	5.8728e+06
41	336168	5.87276e+06
42	336214	5.8725e+06
43	336413	5.87255e+06
44	336296	5.87239e+06
45	340268	5.87005e+06
46	340467	5.87013e+06
47	340606	5.87018e+06
48	340171	5.86987e+06
49	339994	5.8698e+06
50	339898	5.86956e+06
51	339241	5.87037e+06
52	339141	5.87028e+06
53	339387	5.87011e+06
54	339467	5.87003e+06
55	339884	5.86928e+06
56	339712	5.86982e+06
57	340494	5.87067e+06
58	340875	5.8707e+06
59	340812	5.87072e+06
60	340165	5.87111e+06
61	340089	5.87088e+06
62	339851	5.87076e+06
63	339469	5.87093e+06
64	339386	5.87107e+06
65	341092	5.87073e+06
66	341978	5.87036e+06
67	341986	5.8701e+06
68	342504	5.87044e+06
69	342378	5.87052e+06
70	341602	5.87022e+06
71	341625	5.87018e+06
72	341652	5.86978e+06
73	341808	5.86998e+06
74	341208	5.87017e+06
75	341084	5.87013e+06
76	340989	5.8699e+06
77	341281	5.87041e+06
78	334738	5.86847e+06
79	334411	5.86879e+06
80	334011	5.86787e+06
81	334071	5.86787e+06
82	333812	5.86785e+06
83	333606	5.86807e+06
84	333636	5.86861e+06
85	332334	5.86866e+06
86	332215	5.8686e+06
87	334612	5.86787e+06
88	335030	5.86792e+06
89	335256	5.86766e+06
90	335150	5.86698e+06
91	335575	5.86681e+06
92	335430	5.867e+06
93	335626	5.86715e+06
94	335422	5.86739e+06
95	335808	5.8671e+06
96	335851	5.86703e+06
97	334496	5.86666e+06
98	334683	5.86647e+06
99	334840	5.86651e+06
100	335148	5.8662e+06
101	335424	5.86627e+06
102	335443	5.86639e+06
103	335602	5.86637e+06
104	335986	5.86622e+06
105	335976	5.86676e+06
106	336299	5.86642e+06
107	336418	5.86665e+06
108	335364	5.86538e+06
109	334082	5.8654e+06
110	333590	5.86542e+06
111	333572	5.86524e+06
112	334067	5.86715e+06
113	337698	5.86947e+06
114	337355	5.87055e+06
115	337578	5.87041e+06
116	337666	5.87054e+06
117	342150	5.86989e+06
118	342391	5.86985e+06
119	342509	5.86993e+06
120	342623	5.87022e+06
121	342789	5.86998e+06
122	346855	5.86591e+06
123	347155	5.86509e+06
124	347134	5.86515e+06
125	356367	5.85223e+06
126	356547	5.85233e+06
127	372976	5.86229e+06
128	373806	5.86193e+06
129	373099	5.86148e+06
130	372981	5.86112e+06
131	371795	5.86235e+06
132	372018	5.8623e+06
133	371854	5.86227e+06
134	371884	5.8622e+06
135	391830	5.85062e+06
136	392441	5.85197e+06
137	392446	5.85211e+06
138	391867	5.85155e+06
139	392024	5.85166e+06
140	391743	5.85175e+06
141	391600	5.85181e+06
142	391320	5.85182e+06
143	391428	5.85151e+06
144	392173	5.84562e+06
145	391769	5.84585e+06
146	391561	5.84519e+06
147	390804	5.84602e+06
148	390287	5.84586e+06
149	386042	5.84719e+06
150	331570	5.86412e+06
151	331503	5.86426e+06
152	333535	5.86395e+06
153	333832	5.86407e+06
154	333817	5.86385e+06
155	334017	5.86367e+06
156	334481	5.86364e+06
157	334319	5.86374e+06
158	334681	5.8636e+06
159	333696	5.86483e+06
160	334426	5.8645e+06
161	334319	5.8647e+06
162	334213	5.86496e+06
163	333806	5.86345e+06
164	333721	5.86357e+06
165	333567	5.86336e+06
166	333429	5.86344e+06
167	333281	5.86358e+06
168	333098	5.86374e+06
169	333132	5.86374e+06
170	334386	5.86166e+06
171	334447	5.86156e+06
172	334523	5.86182e+06
173	334798	5.86187e+06
174	334705	5.86245e+06
175	332827	5.86237e+06
176	332709	5.86231e+06
177	332961	5.86259e+06
178	330977	5.86189e+06
179	331377	5.86205e+06
180	330208	5.86037e+06
181	330225	5.85963e+06
182	330367	5.85964e+06
183	330404	5.85976e+06
184	330458	5.85998e+06
185	330535	5.86014e+06
186	330264	5.86066e+06
187	329900	5.85987e+06
188	329913	5.86007e+06
189	329973	5.86011e+06
190	330571	5.86036e+06
191	330546	5.86048e+06
192	330423	5.8607e+06
193	329244	5.85863e+06
194	329232	5.85913e+06
195	329196	5.85897e+06
196	331289	5.85848e+06
197	331544	5.85876e+06
198	333952	5.85323e+06
199	334220	5.85346e+06
200	334295	5.85368e+06
201	334666	5.85295e+06
202	334753	5.85277e+06
203	334431	5.85294e+06
204	337487	5.85126e+06
205	337665	5.85217e+06
206	338587	5.85311e+06
207	338485	5.85307e+06
208	338467	5.85304e+06
209	338887	5.85311e+06
210	339713	5.85179e+06
211	338802	5.85053e+06
212	338478	5.8506e+06
213	338419	5.85056e+06
214	338297	5.85064e+06
215	337912	5.85061e+06
216	337821	5.85049e+06
217	340114	5.84992e+06
218	339993	5.84985e+06
219	339692	5.84997e+06
220	339712	5.84893e+06
221	340130	5.84916e+06
222	340286	5.84929e+06
223	340387	5.85005e+06
224	342032	5.84532e+06
225	341841	5.84491e+06
226	341959	5.84584e+06
227	342021	5.84588e+06
228	342045	5.8459e+06
229	341706	5.84553e+06
230	341931	5.84552e+06
231	342355	5.84533e+06
232	342431	5.84539e+06
233	342530	5.84541e+06
234	343752	5.8444e+06
235	343970	5.84454e+06
236	344211	5.84447e+06
237	344289	5.84463e+06
238	344544	5.84469e+06
239	344442	5.84481e+06
240	344539	5.84503e+06
241	344759	5.8451e+06
242	340935	5.84708e+06
243	341141	5.84693e+06
244	340976	5.84692e+06
245	341560	5.84771e+06
246	342186	5.84744e+06
247	341844	5.84754e+06
248	342184	5.84762e+06
249	342100	5.84778e+06
250	341555	5.84699e+06
251	341396	5.84693e+06
252	341568	5.84735e+06
253	340505	5.85223e+06
254	340487	5.85213e+06
255	340758	5.85057e+06
256	341839	5.84964e+06
257	341707	5.8493e+06
258	341566	5.84929e+06
259	341447	5.84933e+06
260	341423	5.84951e+06
261	342022	5.84952e+06
262	342142	5.84952e+06
263	342378	5.84973e+06
264	342612	5.84999e+06
265	342728	5.85037e+06
266	341403	5.85139e+06
267	341662	5.85132e+06
268	344378	5.84767e+06
269	344171	5.84779e+06
270	343468	5.84739e+06
271	343515	5.84697e+06
272	343405	5.84713e+06
273	344626	5.84733e+06
274	344855	5.8474e+06
275	345198	5.84705e+06
276	344956	5.847e+06
277	343623	5.84663e+06
278	343525	5.84655e+06
279	343444	5.84661e+06
280	343629	5.84631e+06
281	344335	5.84611e+06
282	344813	5.84618e+06
283	344887	5.84632e+06
284	344867	5.84658e+06
285	344568	5.84672e+06
286	344324	5.84573e+06
287	344677	5.8458e+06
288	344801	5.8459e+06
289	349161	5.84587e+06
290	348787	5.8457e+06
291	348468	5.84558e+06
292	349057	5.84701e+06
293	349201	5.84681e+06
294	349532	5.8463e+06
295	349581	5.84644e+06
296	349295	5.84621e+06
297	349214	5.84619e+06
298	348260	5.84693e+06
299	348375	5.84705e+06
300	348654	5.84714e+06
301	348838	5.84728e+06
302	348969	5.84745e+06
303	349019	5.84789e+06
304	348880	5.84785e+06
305	348661	5.8478e+06
306	348934	5.84865e+06
307	348754	5.84898e+06
308	348659	5.8488e+06
309	347613	5.84806e+06
310	347827	5.84834e+06
311	344789	5.84832e+06
312	344933	5.84424e+06
313	345327	5.84485e+06
314	345361	5.84501e+06
315	345691	5.84536e+06
316	345965	5.84658e+06
317	345831	5.84644e+06
318	345899	5.84676e+06
319	351330	5.8446e+06
320	350929	5.84466e+06
321	350848	5.84465e+06
322	350791	5.84456e+06
323	350775	5.84446e+06
324	351057	5.84421e+06
325	350862	5.84401e+06
326	350662	5.84398e+06
327	350905	5.84381e+06
328	350753	5.84351e+06
329	350808	5.84359e+06
330	350547	5.84374e+06
331	350501	5.8432e+06
332	351698	5.84408e+06
333	352884	5.84325e+06
334	350339	5.84301e+06
335	349471	5.84448e+06
336	349609	5.8445e+06
337	349678	5.84474e+06
338	349842	5.84491e+06
339	349860	5.84507e+06
340	350110	5.84515e+06
341	350510	5.84546e+06
342	351362	5.84114e+06
343	352007	5.84089e+06
344	351410	5.84078e+06
345	352707	5.83999e+06
346	352791	5.83987e+06
347	352590	5.83975e+06
348	353017	5.83967e+06
349	352916	5.83965e+06
350	353186	5.84008e+06
351	353090	5.83983e+06
352	353203	5.8402e+06
353	353136	5.84033e+06
354	353224	5.8407e+06
355	351632	5.83888e+06
356	351747	5.83902e+06
357	352062	5.83929e+06
358	352201	5.83929e+06
359	352279	5.8395e+06
360	352210	5.8399e+06
361	352557	5.84172e+06
362	352414	5.84158e+06
363	349845	5.842e+06
364	352240	5.83841e+06
365	352765	5.83855e+06
366	352658	5.83852e+06
367	352875	5.83871e+06
368	352888	5.83895e+06
369	352884	5.83913e+06
370	352646	5.83913e+06
371	362289	5.84279e+06
372	361275	5.84343e+06
373	358486	5.84289e+06
374	359517	5.84285e+06
375	359335	5.84155e+06
376	359044	5.84114e+06
377	359066	5.84106e+06
378	359262	5.84226e+06
379	359099	5.84296e+06
380	354766	5.84199e+06
381	354547	5.84194e+06
382	354441	5.8421e+06
383	355600	5.84157e+06
384	355305	5.8411e+06
385	355185	5.84106e+06
386	355261	5.84126e+06
387	355451	5.84086e+06
388	356175	5.8406e+06
389	356137	5.84048e+06
390	356093	5.84078e+06
391	356263	5.84006e+06
392	356322	5.84024e+06
393	355848	5.83993e+06
394	355707	5.84005e+06
395	354907	5.83909e+06
396	354607	5.83905e+06
397	354485	5.83916e+06
398	354342	5.83922e+06
399	355105	5.83916e+06
400	355259	5.83944e+06
401	354170	5.83896e+06
402	353989	5.83903e+06
403	353849	5.83923e+06
404	354434	5.83968e+06
405	353346	5.83928e+06
406	353754	5.83965e+06
407	353644	5.83993e+06
408	352721	5.84205e+06
409	353819	5.84221e+06
410	353346	5.84204e+06
411	353646	5.84199e+06
412	353325	5.84176e+06
413	353671	5.84173e+06
414	353457	5.84132e+06
415	353453	5.84148e+06
416	353584	5.84109e+06
417	353712	5.84077e+06
418	354768	5.84091e+06
419	354743	5.84113e+06
420	354943	5.84067e+06
421	354932	5.84051e+06
422	354846	5.84031e+06
423	354784	5.84011e+06
424	354965	5.83817e+06
425	355162	5.83837e+06
426	355346	5.83816e+06
427	355558	5.83879e+06
428	355444	5.83922e+06
429	355688	5.83903e+06
430	352865	5.83787e+06
431	352875	5.83783e+06
432	352885	5.83815e+06
433	353484	5.83818e+06
434	354212	5.83794e+06
435	354626	5.83735e+06
436	354705	5.8382e+06
437	352361	5.83746e+06
438	352861	5.83737e+06
439	356080	5.83836e+06
440	355831	5.83783e+06
441	356228	5.839e+06
442	363775	5.83692e+06
443	363731	5.83906e+06
444	363673	5.83897e+06
445	363748	5.83918e+06

## Sheet: Beechworth
Channel head	Easting	Northing
1	479280	5.96328e+06
2	479316	5.9635e+06
3	479494	5.9636e+06
4	478795	5.9635e+06
5	479529	5.96382e+06
6	479526	5.96398e+06
7	479755	5.96446e+06
8	482814	5.96347e+06
9	482728	5.96325e+06
10	482584	5.96317e+06
11	481299	5.96518e+06
12	483280	5.96296e+06
13	479392	5.96266e+06
14	479130	5.96273e+06
15	478966	5.96301e+06
16	479109	5.96315e+06
17	480959	5.96339e+06
18	481042	5.96321e+06
19	481046	5.96308e+06
20	480774	5.96277e+06
21	480948	5.96275e+06
22	481001	5.96285e+06
23	479422	5.96126e+06
24	480819	5962308
25	480901	5.96249e+06
26	481410	5.95916e+06
27	481542	5.95842e+06
28	481592	5.95849e+06
29	481518	5.95856e+06
30	481513	5.95884e+06
31	481496	5.95872e+06
32	481746	5.96007e+06
33	481529	5.95992e+06
34	482792	5.96169e+06
35	481952	5.95911e+06
36	482029	5.95902e+06
37	482531	5.95892e+06
38	482586	5.95917e+06
39	482825	5.95921e+06
40	482613	5.95975e+06
41	482514	5.95876e+06
42	482075	5.95866e+06
43	482008	5.95927e+06
44	482136	5.95954e+06
45	482276	5.95972e+06
46	473928	5.96767e+06
47	474066	5.96777e+06
48	478816	5.96367e+06
49	478674	5.96263e+06
50	478997	5.96247e+06
51	480998	5.95865e+06
52	482448	5.95825e+06
53	482343	5.9583e+06
54	482239	5.95854e+06
55	482429	5.9591e+06
56	484775	5.95575e+06
57	484787	5.95543e+06
58	484550	5.95519e+06
59	484205	5.95542e+06
60	484592	5.95501e+06
61	484659	5.95481e+06
62	484759	5.95479e+06
63	485295	5.9549e+06
64	485252	5.95508e+06
65	485508	5.95519e+06
66	485644	5.95531e+06
67	485807	5.95538e+06
68	485680	5.95489e+06
69	485986	5.95532e+06
70	486115	5.95514e+06
71	486855	5.95396e+06
72	487120	5.95362e+06
73	487231	5.95414e+06
74	487170	5.95426e+06
75	486758	5.95462e+06
76	486452	5.95507e+06
77	486669	5.95475e+06
78	486636	5.95488e+06
79	486758	5.95485e+06
80	486817	5.95284e+06
81	486885	5.9534e+06
82	487514	5.95305e+06
83	487249	5.9533e+06
84	487096	5.95294e+06
85	487514	5.95211e+06
86	487833	5.95218e+06
87	488372	5.95227e+06
88	488285	5.95275e+06
89	488018	5.95288e+06
90	487914	5.95304e+06
91	487850	5.95324e+06
92	488271	5.95316e+06
93	485940	5.95588e+06
94	485895	5.95604e+06
95	487120	5.95552e+06
96	487185	5.95541e+06
97	486978	5.95568e+06
98	487461	5.95559e+06
99	487642	5.95555e+06
100	487556	5.95581e+06
101	487553	5.95597e+06
102	487453	5.95593e+06
103	488299	5.95489e+06
104	488721	5.95474e+06
105	488895	5.95404e+06
106	488809	5.9543e+06
107	488510	5.95413e+06
108	488250	5.95413e+06
109	488253	5.95425e+06
110	488404	5.95451e+06
111	488102	5.95462e+06
112	488412	5.95509e+06
113	487876	5.9549e+06
114	487655	5.95493e+06
115	487549	5.95507e+06
116	488479	5.95563e+06
117	487863	5.95562e+06
118	487919	5.95574e+06
119	489913	5.95504e+06
120	491415	5.95595e+06
121	491848	5.9552e+06
122	496425	5.95252e+06
123	496938	5.95385e+06
124	498683	5.95545e+06
125	501799	5.95755e+06

## Sheet: Wilsons Promontory
Channel head	Easting	Northing
1	443386	5.67818e+06
2	443388	5.6782e+06
3	443341	5.67826e+06
4	443398	5.67833e+06
5	443546	5.678e+06
6	443356	5.67777e+06
7	443312	5.67774e+06
8	443388	5.67904e+06
9	443684	5.67884e+06
10	443644	5.67916e+06
11	441939	5.6815e+06
12	441992	5.68143e+06
13	442047	5.6814e+06
14	442056	5.68137e+06
15	442093	5.68143e+06
16	442012	5.68143e+06
17	441769	5.68304e+06
18	441838	5.68288e+06
19	441999	5.68265e+06
20	442215	5.68542e+06
21	442316	5.6854e+06
22	441925	5.68554e+06
23	442782	5.68517e+06
24	443450	5.68225e+06
25	443493	5.68227e+06
26	443823	5.68228e+06
27	444766	5.68119e+06
28	444732	5.68138e+06
29	444934	5.68112e+06
30	444962	5.68125e+06
31	444461	5.68153e+06
32	445305	5.68122e+06
33	445355	5.68124e+06
34	445236	5.68124e+06
35	445358	5.6815e+06
36	445190	5.6816e+06
37	445298	5.68161e+06
38	445434	5.68172e+06
39	445499	5.6817e+06
40	445375	5.68135e+06
41	445622	5.68189e+06
42	445592	5.68172e+06
43	445754	5.68162e+06
44	445372	5.68174e+06
45	445077	5.68223e+06
46	445426	5.68244e+06
47	445101	5.68244e+06
48	445065	5.68245e+06
49	445031	5.68273e+06
50	444792	5.68266e+06
51	444364	5.68273e+06
52	444310	5.68279e+06
53	444542	5.6826e+06
54	444622	5.68265e+06
55	442898	5.68254e+06
56	442914	5.68256e+06
57	442694	5.68266e+06
58	442677	5.68267e+06
59	442667	5.68274e+06
60	445922	5.6794e+06
61	445441	5.67926e+06
62	445567	5.67931e+06
63	445420	5.67937e+06
64	445304	5.67948e+06
65	445251	5.67938e+06
66	445932	5.67995e+06
67	445692	5.67947e+06
68	445737	5.67944e+06
69	445799	5.67946e+06
70	445683	5.6794e+06
71	445735	5.67973e+06
72	445718	5.67979e+06
73	445699	5.67979e+06
74	445545	5.67979e+06
75	445647	5.67978e+06
76	445815	5.6799e+06
77	445500	5.67984e+06
78	445624	5.6802e+06
79	445605	5.67994e+06
80	445529	5.67998e+06
81	445489	5.68031e+06
82	446220	5.68015e+06
83	446306	5.68021e+06
84	444952	5.68015e+06
85	445168	5.6805e+06
86	445318	5.68038e+06
87	444240	5.68063e+06
88	444846	5.68069e+06
89	446413	5.68149e+06
90	446663	5.68153e+06
91	446342	5.68191e+06
92	446269	5.68184e+06
93	447134	5.68094e+06
94	446649	5.6811e+06
95	446808	5.68109e+06
96	446862	5.68105e+06
97	446803	5.68081e+06
98	447221	5.6808e+06
99	447636	5.68089e+06
100	447879	5.68118e+06
101	447009	5.6804e+06
102	447039	5.68032e+06
103	447046	5.68045e+06
104	447243	5.68018e+06
105	447103	5.68005e+06
106	447124	5.67998e+06
107	447108	5.6799e+06
108	447080	5.68016e+06
109	447038	5.68024e+06
110	447160	5.68025e+06
111	446805	5.67985e+06
112	442799	5.67756e+06
113	443105	5.67688e+06
114	442940	5.67714e+06
115	443288	5.67686e+06
116	443357	5.67695e+06
117	443384	5.67697e+06
118	443558	5.67691e+06
119	443094	5.67655e+06
120	443136	5.67656e+06
121	443160	5.67657e+06
122	443323	5.67661e+06
123	443357	5.67663e+06
124	443403	5.67666e+06
125	443325	5.67695e+06
126	443420	5.67687e+06
127	443542	5.67703e+06
128	443717	5.6769e+06
129	443463	5.6772e+06
130	442119	5.67789e+06
131	445635	5.67733e+06
132	445599	5.67754e+06
133	445680	5.67777e+06
134	445518	5.67791e+06
135	445103	5.67818e+06
136	445044	5.67815e+06
137	445061	5.67838e+06
138	444694	5.6795e+06
139	444625	5.67943e+06
140	444496	5.67952e+06
141	444462	5.6796e+06
142	444432	5.67945e+06
143	444530	5.67969e+06
144	446609	5.67951e+06
145	446253	5.67972e+06
146	446937	5.68328e+06
147	447054	5.6834e+06
148	446994	5.68332e+06
149	447000	5.68334e+06
150	446885	5.68329e+06
151	446678	5.68344e+06
152	446757	5.6834e+06
153	446418	5.68414e+06
154	446405	5.68426e+06
155	446343	5.6845e+06
156	446130	5.68486e+06
157	446110	5.68467e+06
158	446080	5.68537e+06
159	446251	5.68528e+06
160	446279	5.68571e+06
161	446245	5.68599e+06
162	446062	5.68675e+06
163	446337	5.68737e+06
164	445972	5.6881e+06
165	446192	5.68809e+06
166	445937	5.68816e+06
167	445847	5.68837e+06
168	446743	5.68854e+06
169	446587	5.68763e+06
170	446367	5.68767e+06
171	446287	5.68789e+06
172	446687	5.68743e+06
173	446711	5.68702e+06
174	447072	5.68684e+06
175	447571	5.68812e+06
176	447515	5.68847e+06
177	447100	5.68859e+06
178	442228	5.69018e+06
179	443147	5.68405e+06
180	444345	5.68589e+06
181	444257	5.68564e+06
182	443557	5.68628e+06
183	443919	5.68795e+06
184	442640	5.68798e+06
185	438974	5.68308e+06
186	439023	5.68303e+06
187	439138	5.68288e+06
188	438933	5.68327e+06
189	441876	5.6819e+06
190	441918	5.68208e+06
191	441935	5.68203e+06
192	442154	5.6821e+06
193	442050	5.6825e+06
194	443910	5.68464e+06
195	444212	5.68492e+06
196	442992	5.69156e+06
197	443181	5.69162e+06
198	442670	5.69195e+06
199	445935	5.69144e+06
200	445888	5.69143e+06
201	445854	5.69158e+06
202	445916	5.69144e+06
203	446768	5.69134e+06
204	446838	5.69122e+06
205	442702	5.67352e+06
206	443110	5.67318e+06
207	443063	5.67331e+06
208	443115	5.67348e+06
209	444189	5.67292e+06
210	443743	5.67311e+06
211	443809	5.67322e+06
212	443833	5.67306e+06
213	443765	5.67328e+06
214	444376	5.67306e+06
215	444445	5.67308e+06
216	444463	5.67302e+06
217	443186	5.67107e+06
218	442699	5.67128e+06
219	442543	5.67161e+06
220	442253	5.67222e+06
221	442334	5.67226e+06
222	441868	5.67272e+06
223	444297	5.67274e+06
224	442183	5.67379e+06
225	446166	5.6771e+06
226	446206	5.67701e+06
227	446286	5.67737e+06
228	448654	5.6779e+06
229	445471	5.67851e+06
230	445341	5.67852e+06
231	445647	5.6786e+06
232	445949	5.67831e+06
233	446030	5.67878e+06
234	444644	5.68057e+06
235	444844	5.68023e+06
236	444862	5.68026e+06
237	444915	5.68029e+06
238	445057	5.68038e+06
239	445094	5.68011e+06
240	447349	5.68324e+06
241	448996	5.67648e+06
242	448741	5.67632e+06
243	448894	5.67654e+06
244	445939	5.67691e+06
245	448679	5.67758e+06
246	446889	5.67662e+06
247	445750	5.67708e+06
248	446318	5.67648e+06
249	440314	5.67929e+06
250	440688	5.67969e+06
251	440769	5.6798e+06
252	440789	5.67984e+06
253	440841	5.67999e+06
254	443956	5.67849e+06
255	443926	5.67807e+06
256	444053	5.67816e+06
257	444025	5.67819e+06
258	444056	5.67708e+06
259	443951	5.67706e+06
260	444093	5.67721e+06
261	441458	5.67768e+06
262	441456	5.67771e+06

## Sheet: The Grampians
Channel head	Easting	Northing
1	633668	5.87845e+06
2	633680	5.89482e+06
3	633924	5.89451e+06
4	633767	5.89435e+06
5	633586	5.89414e+06
6	633707	5.89381e+06
7	633671	5.89414e+06
8	633833	5.89328e+06
9	633872	5.89306e+06
10	633920	5.89279e+06
11	634181	5.89205e+06
12	634009	5.89185e+06
13	633861	5.89182e+06
14	634158	5.8918e+06
15	634158	5.89174e+06
16	633768	5.89036e+06
17	633654	5.88937e+06
18	634015	5.88936e+06
19	633379	5.889e+06
20	633236	5.88915e+06
21	633272	5.88912e+06
22	633605	5.88889e+06
23	633484	5.88882e+06
24	633532	5.8887e+06
25	633342	5.8887e+06
26	633769	5.88858e+06
27	633707	5.88865e+06
28	633734	5.88867e+06
29	634356	5.88769e+06
30	629956	5.88735e+06
31	629453	5.88734e+06
32	628506	5.88747e+06
33	629503	5.88703e+06
34	634665	5.88617e+06
35	634853	5.88609e+06
36	635153	5.88435e+06
37	635145	5.88463e+06
38	634759	5.88536e+06
39	635261	5.88378e+06
40	635342	5.8839e+06
41	635257	5.88386e+06
42	635153	5.88386e+06
43	635262	5.88392e+06
44	633586	5.88295e+06
45	633450	5.88301e+06
46	633305	5.88325e+06
47	632995	5.88362e+06
48	633591	5.88276e+06
49	633548	5.88279e+06
50	633340	5.88307e+06
51	633843	5.88202e+06
52	633846	5.88219e+06
53	633848	5.88223e+06
54	634668	5.88218e+06
55	634776	5.88038e+06
56	634620	5.88098e+06
57	634098	5.88035e+06
58	633719	5.8797e+06
59	633502	5.87952e+06
60	633334	5.87922e+06
61	633570	5.87878e+06
62	633408	5.879e+06
63	633739	5.87838e+06
64	633911	5.87828e+06
65	633810	5.87809e+06
66	634780	5.87829e+06
67	634762	5.87834e+06
68	634919	5.87774e+06
69	634853	5.8779e+06
70	634627	5.87777e+06
71	634603	5.87785e+06
72	634610	5.8779e+06
73	634572	5.87794e+06
74	633987	5.8772e+06
75	633960	5.87686e+06
76	633961	5.87733e+06
77	634160	5.8762e+06
78	634433	5.87588e+06
79	634517	5.8752e+06
80	634691	5.87529e+06
81	634502	5.87482e+06
82	634748	5.87428e+06
83	634802	5.87415e+06
84	634807	5.87411e+06
85	634670	5.87388e+06
86	634679	5.87341e+06
87	634561	5.87457e+06
88	633381	5.87655e+06
89	633032	5.87664e+06
90	633237	5.8767e+06
91	633618	5.87479e+06
92	631233	5.87803e+06
93	632599	5.87831e+06
94	632542	5.87822e+06
95	632525	5.87808e+06
96	632324	5.87824e+06
97	631935	5.87777e+06
98	631005	5.87772e+06
99	630887	5.87734e+06
100	630459	5.8783e+06
101	630699	5.87828e+06
102	630681	5.8782e+06
103	630792	5.87826e+06
104	630842	5.87827e+06
105	630971	5.87843e+06
106	630985	5.87845e+06
107	631177	5.87858e+06
108	631221	5.87858e+06
109	630975	5.87858e+06
110	630874	5.87866e+06
111	630738	5.87868e+06
112	631353	5.8787e+06
113	631169	5.87822e+06
114	631201	5.87828e+06
115	631176	5.87827e+06
116	631046	5.87869e+06
117	631123	5.87878e+06
118	631562	5.87857e+06
119	631447	5.87823e+06
120	629288	5.88188e+06
121	634145	5.87199e+06
122	634183	5.87199e+06
123	634236	5.872e+06
124	634264	5.87198e+06
125	633743	5.87262e+06
126	633699	5.87264e+06
127	632850	5.87341e+06
128	638485	5.8727e+06
129	640924	5.87315e+06
130	640581	5.87341e+06
131	639959	5.87271e+06
132	639868	5.87284e+06
133	639850	5.8729e+06
134	640011	5.87264e+06
135	641744	5.87501e+06
136	641788	5.87504e+06
137	641783	5.87511e+06
138	641767	5.8757e+06
139	641805	5.87614e+06
140	641635	5.87655e+06
141	641631	5.87658e+06
142	641590	5.87662e+06
143	641641	5.87672e+06
144	640007	5.87129e+06
145	639977	5.87137e+06
146	639493	5.87195e+06
147	639409	5.87238e+06
148	634481	5.87135e+06
149	634223	5.87081e+06
150	634459	5.87118e+06
151	634525	5.87149e+06
152	634529	5.87161e+06
153	633072	5.86796e+06
154	632984	5.86747e+06
155	633106	5.86761e+06
156	640884	5.86677e+06
157	641535	5.86787e+06
158	641530	5.86813e+06
159	641560	5.86817e+06
160	641516	5.86816e+06
161	641447	5.86821e+06
162	641382	5.86831e+06
163	641425	5.86827e+06
164	642265	5.86939e+06
165	641827	5.86959e+06
166	641816	5.86953e+06
167	641939	5.86977e+06
168	640294	5.87087e+06
169	642373	5.87061e+06
170	642088	5.87041e+06
171	641977	5.87025e+06
172	642053	5.87024e+06
173	641525	5.86635e+06
174	641681	5.86704e+06
175	641707	5.86709e+06
176	641605	5.86736e+06
177	642048	5.86898e+06
178	641768	5.86747e+06
179	640298	5.86588e+06
180	640026	5.86582e+06
181	641004	5.86557e+06
182	640089	5.86562e+06
183	639906	5.86568e+06
184	635031	5.86111e+06
185	635596	5.86309e+06
186	635897	5.86299e+06
187	629552	5.85752e+06
188	629572	5.85756e+06
189	629598	5.85757e+06
190	629796	5.85801e+06
191	629147	5.85067e+06
192	629256	5.85079e+06
193	629409	5.85088e+06
194	629000	5.85056e+06
195	633064	5.85741e+06
196	626089	5.85312e+06
197	625955	5.85202e+06
198	625922	5.852e+06
199	625885	5.852e+06
200	625828	5.85197e+06
201	625706	5.85193e+06
202	629944	5.85156e+06
203	629989	5.85158e+06
204	624326	5.8499e+06
205	624378	5.84991e+06
206	622057	5.84749e+06
207	621345	5.84525e+06
208	620775	5.84074e+06
209	620402	5.83991e+06
210	619898	5.83925e+06
211	619812	5.83909e+06
212	619791	5.83904e+06
213	619636	5.83779e+06
214	619693	5.83792e+06
215	618590	5.8372e+06
216	616945	5.83409e+06
217	616935	5.83414e+06
218	615120	5.88092e+06
219	639274	5.86867e+06
220	638363	5.86873e+06
221	632268	5.89531e+06
222	632970	5.90138e+06
223	632383	5.90272e+06
